## **The impact of local adaptation and biological invasion on the geographical distribution of *Aedes aegypti* in Panama**

Kelly L. Bennett\*, W. Owen McMillan\*<sup>1</sup> & Jose R. Loaiza\*†‡<sup>1</sup>.

<sup>1</sup>W.O.M and J.R.L contributed equally to this work.

\* Smithsonian Tropical Research Institute, P.O. Box 0843-03092, Balboa Ancon, República de Panamá.

† Instituto de Investigaciones Científicas y Servicios de Alta Tecnología, P. O. Box 0843-01103, Panamá, República de Panamá.

‡ Programa Centroamericano de Maestría en Entomología, Universidad de Panamá, República de Panamá.

### **Corresponding author**

Correspondence and requests for materials should be addressed to K.L.B., email:

[bennettK@si.edu](mailto:bennettK@si.edu); and to J.R.L., email: [jloaiza@indicasat.org.pa](mailto:jloaiza@indicasat.org.pa).

## Abstract

Local adaptation is an important consideration when predicting arthropod-borne disease risk because it can impact on individual vector fitness and vector population persistence. However, the extent that populations are adapted to local environmental conditions remains unknown. Here, we identified 128 candidate SNPs, clustered within 17 genes, which show a strong genetic signal of adaptation across Panama. Analysis of genome-wide SNPs showed that the local adaptation of *Aedes aegypti* mosquito populations occurs across relatively fine geographic scales. The composition and frequency of candidate adaptive loci differed between populations in wet tropical environments along the Caribbean coast and the dry tropical conditions typical of the Pacific coast of Panama. Temperature and vegetation were important predictors of adaptive genomic variation in *Ae. aegypti* with areas of local adaptation occurring within the Caribbean region of Bocas del Toro, the Pacific coastal areas of Herrera and Panama City and the eastern Azuero Peninsula. In addition, we found that the geographic distribution of *Ae. aegypti* across Panama is rapidly changing as a consequence of the recent invasion by its ecological competitor, *Aedes albopictus*. Although *Ae. albopictus* has displaced *Ae. aegypti* in some areas, species coexist across many areas, including regions where *Ae. aegypti* are locally adapted. Our results guide future experimental work by suggesting that adaptive variation within *Ae. aegypti* is affecting the outcome of inter-specific competition with *Ae. albopictus* and, as a consequence, may fundamentally alter future arboviral disease risk and efforts to control mosquito populations.

## Introduction

The establishment and persistence of vectors within new geographic locations poses a serious threat from emerging and endemic arboviral diseases (1, 2). For example, shifts in the distribution of ticks and *Culex* mosquitoes are linked to the rise of West Nile Virus and tick-borne encephalitis viruses within North America (3–5). In addition, the introduction of invasive *Aedes* mosquitoes has facilitated the recent spread of Zika and Chikungunya viruses throughout the Americas (6, 7). Although introduced vector populations are unlikely to be at their fitness optimum when first confronted with a new environment, local adaptation may play a large role in disease dynamics as populations become established and adaptive variation spreads. The importance of adaptation for human disease is exemplified in *Aedes aegypti*'s evolution to human commensalism and the establishment of a number of arboviruses worldwide (8). This mosquito has undergone behavioural and genetic changes in comparison to its ancestral African form, including the evolution of house-entering behaviour and a preference for human odour and blood-feeding (9–11). The adaptation of *Ae. aegypti* to exploit human environments has allowed for the spread of zoonotic arboviral diseases from forest animals to humans and promoted invasiveness through human-assisted dispersal (8). As mosquito vectors adapt to their environment, increase their relative fitness and acquire new traits, the disease landscape can potentially change to increase the threat of human arboviruses. However, local environmental adaptation has not yet been characterised for any *Aedes* mosquito.

Here we characterize genome-wide variation in *Ae. aegypti* across Panama and use this data to explore the interplay between invasion history, local adaptation, and ecological change.

Panama provides an ideal opportunity to begin to understand how these factors interact and, ultimately, affect the disease landscape. Panama is a small country, measuring just 772 kilometres East to West and 185 km North to South, but provides a wealth of contrasting climatic conditions and discrete environments. This is largely owing to its situation as a narrow isthmus flanked by the Caribbean Sea and Pacific Ocean as well as the Cordillera Central mountain range, which acts as a North-South divide. Panama is also a hub of international shipping trade, providing an important route of *Aedes* mosquito invasion into the Americas. Panama's worldwide connections have potentially facilitated multiple introductions of the invasive *Ae. aegypti* mosquito dating back to the 18<sup>th</sup> century in association with the global shipping trade (8, 12, 13). In addition, the Pan-American highway bisects the country, stretches almost 48,000 km throughout mainland America and provides important conduit for human-assisted dispersal of *Aedes* mosquitoes (14, 15).

We combine ecological and genomic data using Environmental Association Analysis (EAA) to investigate whether *Ae. aegypti* is adapted to the local environmental conditions in Panama. We achieve this by identifying the genomic regions with an adaptive signal considering the underlying population structure through detecting outlier loci associated with biologically relevant environmental variables. Furthermore, we identify the major environmental variables that contribute to putatively adaptive variation and investigate how putative adaptive variation is distributed across geographic space. In addition, we consider the geographical distribution of putatively adapted populations within the context of biological competition. We do so by evaluating the historical and current geographic distributions of both mosquitoes and assessing how putatively locally adapted *Ae. aegypti* are distributed in relation to *Ae. albopictus*. *Ae. albopictus* is similar to *Ae. aegypti* across many ecological axes. The mosquito has expanded from Asia within the last ~40 years and is now also globally distributed (16). In many locations, *Ae. albopictus* has displaced resident *Ae. aegypti* (14, 17), but the factors that facilitate co-occurrence are still unclear (18). *Aedes albopictus* was first documented in Panama in 2002, providing the opportunity to study how the interactions between the two species play out across a heterogeneous landscape. The result of this interaction, i.e. whether these two mosquitoes coexist, is likely to fundamentally reshape the arboviral disease landscape in Panama and provide insight into the relationship between global species interactions and the spatial heterogeneity of viral transmission.

## Results

**Characterisation of sequence variation.** We processed 70 *Ae. aegypti* individuals with hybridisation capture-based enrichment from 14 localities widespread across Panama. An average number of 27,351,514 reads were mapped to the genome for each individual with 62 % of these targeted to the designed capture regions. The mean coverage depth per individual was approximately 74X. After applying stringent quality filters, 371,307 SNP's were identified throughout all captured regions for downstream analyses.

**Global and local population Structure:** Our large SNP dataset allowed us to examine population structure across both global and local scales. Comparison of global population structure was achieved by comparing a subset of 2,630 of our SNP's from Panama that were shared with a previously acquired *Ae. aegypti* SNP dataset from 26 other countries worldwide (19–23). FastStructure analysis revealed that the number of model components

and model maximum likelihood were maximised by assigning each individual to between K4-6 populations. Similar to that reported previously, we find that the new world variation is composed of an admixture of populations distinct from African and Asian sources at higher values of K (19, 20). Individuals from Panama, Costa Rica, Colombia, the Caribbean islands and populations from Arizona and Texas in South western USA were consistently composed of a similar composition throughout each possible value of K (SI Appendix Fig S1). Thus, *Ae. aegypti* from Panama are genetically similar to those throughout the Americas, consistent with a strong geographic component to the distribution of genetic variation across the world (24).

Within Panama, the much larger dataset including all 371,307 SNP's, highlighted significant population structure. There were two major genomic clusters (Fig 1B-C) that distinguished individuals from Bocas del Toro province in the western Caribbean region compared to individuals from all other regions across Panama, revealed on both FastStructure and PCA analysis of all SNP's. In addition, *Ae. aegypti* from the eastern Azuero Peninsula also appear somewhat genetically discrete (Fig 1C). All areas of Panama, including sampling locations on the Azuero Peninsula had similar levels of heterozygosity and therefore the structural differences we observed are not expected to result from a recent population bottleneck or from insecticide spraying treatment, which is irregularly applied during epidemics to target adults only within the urban areas of Panama (Fig 1B).

**Local adaptation in response to the environment.** Our large SNP data set also allowed us to identify loci putatively involved in the local adaptation of *Ae. aegypti* to the environment. As a first step, we applied redundancy analysis (RDA) to jointly identify candidate outlier loci and to assess how candidate variation was partitioned among the different environmental variables. In this analysis, we tested a number of environmental variables including Normalized Difference Vegetation Index (NDVI), average rainfall, average humidity, average minimum and maximum temperature, and human population density. RDA identified 1,154 candidate SNP's with a signal of local adaptation, which we used to visualise putatively adaptive variation on ordination plots. Overall, there was a partitioning of alleles dependant on dry tropical and wet tropical conditions. For example, the position of sampled individuals on the RDA ordination plots, in relation to the depicted environmental variables, revealed that the candidate genotypes of *Ae. aegypti* from the wet tropical regions of Almirante and Changuinola in Bocas del Toro province are positively associated with humidity and average rainfall. Those from the wet tropical region of Chiriquí Grande in Bocas del Toro are also positively associated with increasing NDVI vegetation index and negatively associated with higher temperatures (Fig 2A). In comparison, the candidate genotypes of individuals from dry tropical regions of Panamá province (i.e., Princesa Mía, Lluvia de Oro, Nuevo Chorrillo), Los Santos (i.e., La Villa de Los Santos, Pedasí), Darién (i.e., Metetí) and David in Chiriquí province are somewhat positively influenced by both temperature variables and negatively associated with wet and vegetated conditions. Putatively adaptive variation in individuals from the province of Colón (i.e., Sabanitas and Portobelo), locations which receive high rainfall but higher temperatures and lower vegetation cover than in Bocas del Toro province, are associated with intermediate temperature and vegetation conditions.

RDA is robust in detecting adaptive processes that result from weak, multilocus effects across a range of demographic scenarios and sampling designs (25). However, a proportion

of the 1,154 candidate loci identified through this single analysis were likely false positives. Thus, rather than reflecting local adaptation, the strongly skewed frequency differences could be reflective of demographic processes such as hierarchical population structure, isolation by distance, allele surfing on range expansion and background selection, as well as, coincidental associations of allele frequencies to environmental variation or even covariance to other environmental factors not included in the analysis (26). To further refine our identification of adaptive loci, we identified candidate loci using two additional methods, PCAdapt and Latent Factor Mixed Model analysis (LFMM). Both are considered less sensitive to confounding demography due to their ability to account for population structure or unobserved spatial autocorrelation in the data (27). The three methods identified different numbers of putatively adaptive loci. For example, compared to the 1,154 outlier SNP's identified by RDA, PCAdapt identified 352 SNP's (SI Appendix, Fig S2), whereas LFMM analysis identified 3,426 outlier SNP's with a signature of selection widespread across the genome and associated with the environment respectively (SI Appendix, Fig S3).

Across all three methods there were 128 SNP's consistently identified as outliers, providing greater confidence that these loci are located in or close to genomic regions involved in local adaptation to the environment. These candidate SNPs fell into 15 distinct clusters, suggesting that linkage disequilibrium was driving some of the observed patterns (SI Appendix, Fig S4). The 128 SNPs fell into 17 genes, 11 of which are annotated as involved in structural functions, enzyme activity and metabolism (SI Appendix, Table S1). None of these genes are known to be involved in the development of insecticide resistance in populations of *Aedes* mosquitoes.

We further narrowed down which of the environmental variables contributed most to the partitioning of genomic variation using a combination of Generalised Dissimilarity Modelling (GDM) and Gradient Forests (GF) analyses. Both approaches allowed us to visualize the allelic turnover of these putatively adaptive loci in relation to each environmental variable. The environmental variables that contributed the greatest variance to both GDM and GF models on analysis of the 128 candidate loci were minimum and maximum temperature (SI Appendix, Table S2 and Fig S5). GDM analysis revealed that an increase in average minimum temperature accompanied a large change in putatively adaptive allele frequencies, visualised as a smooth curve accumulating in a steeper incline at the higher temperature range (Fig 2B). In comparison, GF turnover plots show a steeper incline at the mid-range for both average minimum and maximum temperature (SI Appendix, Fig S6-7). GDM analysis also revealed a distinct frequency change in putatively adaptive alleles with increasing NDVI vegetation index, although the change in allele frequency was relatively minor compared to that of minimum temperature (Fig 2B). In comparison, a low to negligible difference in allele frequency was observed in association with average rainfall, average humidity and human population density. Therefore, the variation in putatively adaptive allele frequencies between populations from dry tropical and wet tropical environments of Panama appears largely driven by differences in temperature and NDVI vegetation index.

**Distribution of candidate alleles across geographical space.** Across our 128 candidate SNP's, we used GDM and GF analysis to visualise the change in frequencies across Panama, and therefore the geographical landscape features which increase or decrease the signature of local adaptation in relation to the environment. GDM analysis presents a smoother

turnover in the geographical distribution of putatively adaptive loci than that of putatively neutral loci as indicated by a smoother transition in the colour palette between proximal geographic locations (Fig 3A-B). For example, there was similarity in the colouring and therefore allele composition between wet tropical regions along the Caribbean coast and inland regions including the mainland/islands of Bocas del Toro, Chiriquí, and both the inland and Caribbean coastal regions of Veraguas/Colón. Similarly, there was greater continuity between dry tropical areas including the eastern Azuero Peninsula, Pacific coast of Coclé, David in Chiriquí, Panamá and Darién, indicating that these environments share putatively adaptive alleles. Patterns in the data are less distinct for GF analysis but the geographical distribution of putatively adaptive variation agrees with the GDM analysis in that there is a continuity in the allele composition between the eastern Azuero Peninsula and dry tropical Pacific coastal regions, that is not shared with the wet tropical regions of Veraguas, Chiriquí and Bocas del Toro (SI Appendix, Fig S8).

Allele frequency turnover as predicted under neutral conditions and local adaptation were compared across geographical space to identify locations that show the greatest disparity. These reflect the populations within Panama expected to be experiencing strong local adaptation. Their comparison revealed multiple patches of local adaptation widespread across Panama, with a palpable patch occurring in the Azuero Peninsula, as indicated by a high distance between the patterns of predicted compositional allele frequency turnover (Fig 3C). Local adaptation was not identified in the region of Bocas del Toro. Since this region has a strong population structure and distinct climate within Panama, it is likely that the co-correlation of population structure and environmental variation across our sampling design hinders the inference of local adaptation in this case. This conclusion was supported by FastStructure analysis of the 128 putatively adaptive loci, which revealed that *Ae. aegypti* from the wet tropical region Bocas del Toro has a distinct allele composition composed of alleles assigned to a distinct composition of K populations, including unique alleles in addition to those shared broadly across the dry tropical regions of Panama (SI Appendix, Fig S9). Although the Talamanca mountain range was documented as a natural geographical barrier to dispersal across the region of Bocas del Toro for some *Anopheles* mosquitoes (28), this is not expected to hinder gene flow in *Ae. aegypti*, since human-assisted movement of this mosquito occurs via the local transport network (15). Partitioning of the genomic data into 6K populations reveals that Sabanitas on the Caribbean coast, which is subject to intermediate climate conditions, shares some of the distinct alleles present in Bocas del Toro. Moreover, individuals from the Azuero Peninsula, the driest and least vegetated region of Panama, are also somewhat distinct from other sampled regions since they have reduced levels of admixture.

**The geographical distribution of *Ae. aegypti* in response to invasion by *Ae. albopictus*.** We coupled historical surveys of mosquito populations dating back nearly 15 years with intensive sampling of focal populations over the last three years to understand how the recent invasion of the biological competitor, *Ae. albopictus*, is affecting the geographic distribution and population persistence of *Ae. aegypti*. In our sampling, we found that these mosquitoes exhibit differences in their geographic distributions (Fig 4). Although both species co-exist in many areas throughout Panama, other regions such as some areas in the wet and humid western Azuero Peninsula, rural Chiriquí, Veraguas and the province of Panamá outside of Panama City (Gamboa and Chilibre), were inhabited by *Ae. albopictus*



only. This includes regions, from which *Ae. aegypti* was previously documented by the health authorities, suggesting that *Ae. albopictus* has replaced *Ae. aegypti* from these areas. *Ae. aegypti* is still dominant in Bocas del Toro and Darién, where the arrival of *Ae. albopictus* has only recently occurred (Darién) or has not yet been documented (Bocas del Toro).

The historical data generally collaborates these findings. Analysis of all occurrence data throughout all years revealed that the presence of *Ae. aegypti* is positively and significantly associated with the presence of *Ae. albopictus* (GLM,  $Z = 18.93$ ,  $d.f = 7390$ ,  $P = 0.000$ ), reflecting the continued expansion of *Ae. albopictus* throughout much of *Ae. aegypti*'s range. However, that species replacement is occurring within at least some regions is supported by the proportion of positive sampling sites. This proportion has decreased for *Ae. aegypti* since 2005 from ~50 % to ~20 %, while the presence of *Ae. albopictus* has increased from 0 to ~65 % (SI Appendix, Fig S10), although this is a stochastic process. Comparison of the geographical distribution of putatively locally adapted *Ae. aegypti* as revealed by GDM analysis and the species distribution data revealed that both *Aedes* tend to co-occur in regions with locally adapted *Ae. aegypti*, despite evidence for species replacement elsewhere. Notably long-term co-existence was documented with the Pacific regions of Panama City, Coclé, the eastern Azuero Peninsula and potentially David in Pacific Chiriquí, where patches of local adaptation in *Ae. aegypti* were identified (Fig 3C).

## Discussion

Our study is the first fine-scale study to investigate how the environment shapes genomic variation across *Ae. aegypti* and one of the first to identify genes potentially involved in local adaptation (11). On a regional scale, Panamanian populations of *Ae. aegypti* are genetically similar to other Central and Caribbean American populations highlighting high dispersal potential and recent gene flow in this invasive species; however, this similarity belies a more complex local genomic architecture. Across Panama, a country the size of South Carolina, genomic variation was not structured neutrally. Gene flow is high across the country, with only the isolated Bocas del Toro region showing significant overall population differentiation. Nonetheless, we found evidence of localised adaptation across several environmental variables over a relatively fine geographical scale. The two most important variables that we identified, temperature and NDVI vegetation index, were previously identified as important in predicting large scale *Aedes* distribution patterns (16). Temperature is important for egg laying, development and survival of *Ae. aegypti* in larval habitats (29) and likely to promote selection to thermal tolerance at the adult stage to resist diurnal and inter-seasonal variation (30). Vegetation is considered an important variable that contributes to oviposition cues (31), feeding dynamics (32) and microhabitat characteristics such as local moisture supply and shade (33, 34). At least for temperature, recent experimental work is consistent with local climate adaptation among *Ae. aegypti* populations (32).

The presence of climate adapted *Ae. aegypti* somewhat mirrors the finding that climate variables, most notably precipitation and temperature associated with altitudinal and latitudinal clines, are able to drive population differentiation in both *Anopheles* mosquitoes and *Drosophila* flies (35–38). In the former, the *Anopheles gambiae* species complex is hypothesised to have radiated through ecological speciation driven by adaptation to aridity

and in response to larval habitat competition. This has led to a series of ecotypes with semi-permeable species boundaries (39). The resulting differences among ecotypes in anthropophily and the adult resting behaviour of incipient species has a significant impact on malaria risk (40). Whether *Ae. aegypti* in Panama represent early ecotypic segregation is unknown. Nonetheless, the presence of locally adaptive populations has the potential to alter the future arboviral disease landscape by modifying population parameters. This is true even though the loci identified as putatively adaptive composed a small proportion of the almost 400,000 loci screened in this study and particularly, because of the ongoing dynamics of the competitive interaction between *Ae. aegypti* and the recently introduced *Ae. albopictus*.

The few studies that have assessed adaptive allele frequency change across geographical space support the role that local adaptation plays across a wide range of organisms with varying dispersal abilities (41–47). Thus, the emerging data are demonstrating that even well-connected populations can adapt to environmental differences and habitat heterogeneity across narrow spatial scales. In our case, differentially adapted populations can be considered as population variants which could have potentially different abilities to vector arboviral disease (48–53). Since environmental adaptation is an important driving factor promoting genomic differentiation within mosquito disease vectors, this should be considered in spatially predictive models. Currently, species geographic distribution or disease prediction models incorporate a set of environmental parameters coupled with a predicted outcome on mosquito biology and abundance without considering adaptive response (54, 55). Assuming that the whole population will respond to environmental precursors as a homogenous unit is erroneous when local adaptation is present. Therefore, considering adaptability as a parameter in combination with the environmental response is likely to improve the accuracy of future projections, especially when these have been characterised across a relevant geographical scale (16, 56). In addition, the presence of locally adapted populations could pose challenges for mosquito control since they are likely to experience survival benefits that aid their persistence (57–59), making these populations harder to control. Furthermore, the presence of locally adapted populations threatens the efficiency of gene drive systems aimed at promoting disease resistance within mosquito populations. This is because environmental differences between sites, as well as physical geographical barriers, will restrict mosquito dispersal and therefore limit the spread of beneficial alleles or inherited bacteria (60). However, if locally adaptive alleles are well-characterised, this knowledge could also potentially be exploited. A more tailored approach could improve gene drive efficiency, since locally adapted individuals are theoretically more likely to survive to pass on the intended benefit to the next generation.

Our data suggests that the climate and local adaptation could play a role in species co-occurrence patterns of *Ae. aegypti* and *Ae. albopictus* across the Isthmus of Panama, raising concerns regarding the emergence of sylvatic arboviruses into humans. Similar to studies from the South Eastern USA and Bermuda (61–66), we have found that species co-occurrence is condition dependant, with the long-term persistence of *Ae. aegypti* occurring throughout many areas despite invasion by *Ae. albopictus* 7 to 15 years ago. Previous studies have suggested *Ae. aegypti* is able to persist in dry climate conditions and/or urban environments because they are better adapted (9 and refs within). The eggs of *Ae. aegypti* are more tolerant to higher temperatures and desiccation in comparison to the eggs of *Ae.*



*albopictus*, which are able to survive lower temperatures through diapause (18, 67). In support of these findings, we find that *Ae. aegypti* is able to coexist with *Ae. albopictus*, including within similar habitats (i.e. water containers and tyres) throughout the dry tropical regions of Panama City, Pacific coastal regions of western Panamá, Coclé, Veraguas and the eastern Azuero Peninsula. In comparison, *Ae. albopictus* now dominate areas of rural Chiriquí, rural Panamá and rural Colón moving towards the Caribbean coast as well as parts of the western Azuero Peninsula. All these locations are those of which have relatively high vegetation indexes, cooler temperatures and higher rainfall but which previously formed a fundamental part of *Ae. aegypti*'s niche.

The condition-dependant nature of *Aedes* species distributions raises the question of whether species co-occurrence patterns are partly driven by local environmental adaptation. Although preliminary in nature, we have found evidence for pockets of local adaptation in regions of coexistence, including within the Pacific regions of Coclé and the eastern Azuero Peninsula. Furthermore, we find that potentially adaptive *Ae. aegypti* generally occur in isolation in Bocas del Toro and Costa Abajo near Colon, but whether both species will co-exist in future is unknown, given that *Ae. albopictus* was only recorded from the latter region in 2018. Local adaptation in *Ae. aegypti* could therefore potentially promote the widespread co-occurrence of both *Aedes* species and this has important implications for the emergence of sylvatic arboviral disease. Since *Ae. albopictus* is an opportunistic feeder, able to utilise a wide range of peri-domestic habitats outside of its native range (68, 69), it could act as an efficient bridge vector for emergent zoonotic diseases from the forest (69). The addition of the specialised commensal *Ae. aegypti*, provides the opportunity for any emergent epidemic to spread and be maintained within the urban population (8–11). This scenario may have happened recently, where yellow fever virus re-emerged from forest reservoirs in Brazil (70). In this case, the re-emergence was a function of both ecological changes and vaccination frequency. Unlike yellow fever virus, there is no vaccination against dengue, Zika, or chikungunya, reinforcing the role that ecological changes will likely play in future epidemics.

Local environmental adaptation impacts only a small number of loci across *Ae. aegypti*'s genome, a pattern similar to other landscape genomics in plants (71–73), insects (74) and vertebrates (75). The inability to identify a larger number of loci may be the result of the analytical difficulties in distinguishing true positives and weak multilocus signatures from the genomic differentiation introduced by genetic drift and demography (25, 76). However, selection on just a few loci with large effects is also expected when selective pressure is coupled with ongoing migration since these types of loci can resist the homogenising effects of gene flow (77). These few regions are expected to have a strong impact on fitness in one environment over the other because the allele with the highest fitness is expected to spread to all populations if this condition is not met (77). The identification of small number of putatively adaptive genomic intervals therefore provides exceptional experimental opportunities to determine how selection might be acting. For example, we can measure the impact of allelic variation at these loci on various aspects of fitness across different environmental conditions, both with or without a competitor. Defining species fitness in association with our candidate loci will allow us to untangle the interplay between genomic process, the environment, species competition and how these resolve the spatial distribution and abundance of medically important *Ae. aegypti*. Advances will be used to

improve the accuracy of disease prediction models and characterise the genomic basis of adaptations with the capacity to alter the epidemiological landscape.

## Materials and Methods

**Mosquito Sampling** *Aedes* mosquitoes were collected through active surveillance and oviposition traps placed across 35 settlements and nine provinces of Panama from 2016 and 2018 (SI Appendix, Table S3). Immature stages of *Aedes* from each trap were reared to adulthood as separate collections in the laboratory, identified using the morphological key of Rueda *et al.* (78) and stored in absolute ethanol at -20°C.

**Genomics data.** DNA was extracted from 70 *Ae. aegypti* (Fig 1A), representing populations subject to different environmental conditions using a modified phenol chloroform method (79). To identify putative regions involved in the local adaptation of *Ae. aegypti*, 26.74 Mb of the AaeL3 exome were targeted for capture. For each sample, 100 ng DNA was mechanically sheared to fragment sizes of ~ 350-500 base pairs and processed to add Illumina adapters using the Kapa Hyperprep kit. Amplified libraries were assessed on a Bioanalyser and Qubit before 24 uniquely barcoded individuals each were pooled to a combined mass of 1 µg to create three libraries of 24 individuals for hybridization. Sequence capture of exonic regions was performed on each pool according to the NimbleGen SeqCap EZ HyperCap workflow and using custom probes designed by Roche for the regions we specified (SI Dataset 1).

Low quality base calls (<20) and Illumina adapters were trimmed from sequence ends with TrimGalore (80), before alignment to the *Ae. aegypti* AaeL5 reference genome with Burrows-Wheeler aligner (81). Read duplicates were removed with BamUtil. Sequence reads were processed according to the GATK best practise recommendations, trained with a hard-filtered subset of SNPs using online recommendations (<https://gatkforums.broadinstitute.org/gatk/discussion/2806/howto-apply-hard-filters-to-a-call-set>). SNPs were called with a heterozygosity prior 0.0014 synonymous to previously reported values of theta (24). Filters applied to the resulting SNP dataset included a minimum quality of 30, minimum depth of 30, minimum mean depth of 20, maximum 95 % missing data across individuals and a minor allele frequency  $\geq 0.01$ . Indels were additionally removed to reduce uncertainty in true variable sites by poor alignment to the reference genome.

**Environmental Data.** Climate variables including average rainfall, average humidity, average minimum and maximum temperature difference, average minimum temperature and average maximum temperature were obtained for each collection site from interpolated raster layers composed of values reported by Empresa de Transmisión Eléctrica Panameña (ETESA). All available data points from 2010 to 2017 representing 50-60 meteorological stations across Panama were averaged. NDVI vegetation indexes for Panama were obtained from MODIS Vegetation Indices 16-day L3 Global 250m products (NASA, USA) with values averaged over all available images from 2010 to 2017. Human population density values were obtained from Instituto Nacional de Estadística y Censo 2010. Raster layers for Generalised Dissimilarity Models and Gradient Forest analyses were created for each

variable by inverse distance interpolation across the extent of Panama to a resolution of 0.05 pixels in QGIS version 2.18.15 (82).

The collinearity and covariance of the environmental data was assessed the R Stats package (83). One variable, average minimum and maximum temperature difference was removed from analysis because it was highly correlated with the other temperature variables (>0.8 correlation coefficient). All other variable comparisons had a correlation coefficient below 0.7 and were retained for analysis (SI Appendix, Table S4).

**Analysis of population structure.** FastStructure was also applied to all loci to infer the ancestry proportions of  $K$  modelled populations (84). The optimal model complexity ( $K^*e$ ) was chosen to be two populations using the python script chooseK.py and confirmed by a PCA of all loci performed with the R package PCAdapt (85)(see below). FastStructure analysis with a logistic prior was also applied to 2,630 SNP's shared with a worldwide SNP dataset representing *Ae. aegypti* from 26 different countries (19–23).

**Analysis of local environmental adaptation.** To identify loci with a signal of selection differentiated across regional environmental conditions, three methods with different underlying algorithms and assumptions were applied. Two EAA approaches, redundancy analysis (RDA) and latent factor mixed models (LFMM) were implemented to identify loci associated with environmental predictors. RDA uses multivariate regression to detect genomic variation across environmental predictors as expected from a multilocus signature of selection (25). In comparison, LFMM is a univariate approach which models background variation using latent factors, while simultaneously correlating the observed genotype frequencies of individuals to each environmental variable (86). Before implementation of RDA, missing genotype values were imputed as the most common across all individuals. Loci which are strongly correlated to environmental predictors were then identified through multivariate linear regression of the genomic data with the environmental variables followed by constrained ordination of the fitted values as implemented with the RDA function in the R package Vegan (87). Multi collinearity of the data was verified to be low as indicated by genomic inflation factors ranging from 1.31-5.80. Candidate loci were then identified as those which contribute most to the significant axes as determined by F statistics (88). To account for population structure, we applied two latent factors to our LFMM analysis based on the PCA and scree plots of proportion of explained variance produced with PCAdapt (see below). As per recommendations to improve power, we filtered our data before analysis to include only sites with an MAF > 5 % and analysed our data with five separate LFMM runs, each with 20,000 cycles after an initial burn-in period of 10,000 cycles. Median Z-scores were calculated from the five runs and Bonferroni corrected for multiple tests, before loci significantly correlated with environmental variables were identified based on a false discovery rate of 10 % using the Benjamini-Hochberg procedure outlined in the program documentation. Visualisation of the Bonferroni adjusted probability values for the loci correlated with each environmental factor revealed that the majority of probability values were at a flat distribution while those correlated with environmental variables were within a peak close to 0, indicating that confounding factors were under control. In addition to the two EAA analyses, PCAdapt was applied to identify loci putatively under selection pressure because they deviate from the typical distribution of the test statistic  $Z$  (85). Two  $K$  populations were chosen to account for neutral population structure

in the data based on scree plots of the proportion of explained variance and visual inspection of PCA and STRUCTURE plots which revealed that populations from the region of Bocas del Toro form a distinct genomic grouping (SI Appendix, Fig S11 and Fig 1).

**Distribution of candidate loci across geographical space.** Both putatively neutral and adaptive genomic variation was visualised across geographic space using Generalised Dissimilarity Modelling (GDM) and Gradient Forests (GF) analysis (89). GDM is a regression-based approach which maps allelic turnover using non-linear functions of environmental distance in relation to  $F_{ST}$  genetic distance between SNPs. In comparison, GF uses a machine learning regression tree approach. Through subsetting the genomic and environmental data, the algorithm determines the degree of change for each allele along an environmental gradient and calculates the resulting split importance. Allelic turnover was investigated for both a set of reference SNP's, not expected to be under selective pressure, as well as the loci putatively involved in local adaptation as jointly identified by LFMM, PCAdapt analysis and RDA. SNP's representative of neutral background selection included those not identified as a candidate outlier by any of the three methods. So as to reduce the dataset and avoid inclusion of strongly linked loci, SNP's were thinned by a distance of 10 KB, an appropriate cut-off as indicated by the calculation of  $R_2$  linkage disequilibrium values for this dataset (SI Appendix, Fig S12).

To perform GDM analysis, the R program StAMPP (90) was used to generate the input  $F_{ST}$  matrixes and BBmisc (91) used to rescale the distances between 0 and 1. Environmental and genetic distance data were converted to GDM format and analysis performed using the R package GDM (92). GF analysis (93) was implemented on a matrix of minor allele frequencies for each SNP for both the reference and candidate datasets, obtained through VCFtools (94). Both SNP datasets only included loci present in at least 11 of 14 populations to ensure robust regression. The model was fitted with 2,000 regression trees, a correlation threshold of 0.5 and variable importance computed by conditional permutation with a distribution maximum of 1.37. Both analyses included Moran's eigenvector map (MEM) variables which are weightings derived from the geographic coordinates of sampling locations used to model unmeasured environmental variation and geographic distance analogous to latent factors (89). To visualise the patterns in allele variation in space, PCA was used to reduce the environmental variables into three factors. The difference in genomic composition was mapped across the landscape of Panama by assigning the three centred principle components to RGB colours; similar genomic composition across space is indicated by a similar colour shade. The difference in allele turnover for the reference and candidate dataset was characterised to explore whether allelic turnover was greater than predicted under neutral expectations. Exploration was achieved by comparing and visualising the compositional turnover of allele frequencies for both reference and candidate SNP dataset across geographical space using a Procrustes superimposition on the PCA ordinations.

**Species distribution analysis.** Historical data on species distributions from 2005 to 2017 was obtained from the Panamanian Ministry of Health (MINSA). This data was obtained through active surveillance of settlements regardless of time of year. A binomial Generalised Linear Model was performed to test for an association between the presence and absence of *Ae. aegypti* with the presence and absence of *Ae. albopictus* using the species occurrence data

obtained from both MINSAs and our own sampling using the Stats package in R (83). The proportion of sampling sites positive for *Ae. aegypti* and *Ae. albopictus* presence from 2005 through 2018 were calculated by combining our mosquito surveillance data with that obtained from MINSAs. Maps of the species distribution of *Ae. aegypti* and *Ae. albopictus* were produced in QGIS (82).

## Acknowledgements

We are grateful to Panama's Ministry of Environment (*Mi Ambiente*) and the Panamanian community for supporting our scientific collections of insects in Panama, to Yamileth Chin and Marta Vargas for their guidance in the laboratory and Jose R. Rovira, Carmelo Gómez Martínez and Alejandro Almanza for their assistance in the field.

## Funding

This work was financed in part by MINSAs and the Zika project. Additional funding was provided by the Secretariat for Science, Technology and Innovation (SENACYT) through the research grant IDDS15-047, and from the National System of Investigation (SNI) award to JRL. Research activity by KLB was supported by the Smithsonian Institution Fellowship Program, George Burch Fellowship, The Edward M. and Jeanne C. Kashian Family Foundation Inc and Mr Nicholas Logothetis of Chartwell Consulting Group Inc.

## References

1. Kilpatrick AM, Randolph SE (2012) Drivers, dynamics, and control of emerging vector-borne zoonotic diseases. *Lancet* 380(9857):1946–1955.
2. Weaver SC, Reisen WK (2010) Present and future arboviral threats. *Antiviral Res* 85(2):328–345.
3. Artsob H, et al. (2009) West Nile Virus in the New World: Trends in the spread and proliferation of West Nile Virus in the western hemisphere. *Zoonoses Public Health* 56:357–369.
4. Gasmi S, et al. (2018) Evidence for increasing densities and geographic ranges of tick species of public health significance other than *Ixodes scapularis* in Québec, Canada. *PLoS One* 13(8):e0201924.
5. Sonenshine DE (2018) Range expansion of tick disease vectors in North America: Implications for spread of tick-borne disease. *Int J Environ Res Public Health* 15(3):478.
6. Musso D, Cao-Lormeau VM, Gubler DJ (2018) Zika virus: following the path of dengue and chikungunya? *Lancet* 386(9990):243–244.
7. Weaver SC (2014) Arrival of Chikungunya virus in the New World: Prospects for

- spread and impact on public health. *PLoS Negl Trop Dis* 8(6):e2921.
8. Powell JR, Tabachnick WJ (2013) History of domestication and spread of *Aedes aegypti* - A Review. *Mem Inst Oswaldo Cruz* 108(Suppl 1):11–17.
  9. Brown JE, et al. (2014) Human impacts have shaped historical and recent evolution in *Aedes aegypti*, the dengue and yellow fever mosquito. *Evolution* 68(2):514–525.
  10. Trpis M, Hausermann W (1978) Genetics of house-entering behaviour in East African populations of *Aedes aegypti* (L.) (Diptera: Culicidae) and its relevance to speciation. *Bull Entomol Res* 68(3):521–532.
  11. McBride CS, et al. (2014) Evolution of mosquito preference for humans linked to an odorant receptor. *Nature* 515:222.
  12. Bennett KL, et al. (2016) Historical environmental change in Africa drives divergence and admixture of *Aedes aegypti* mosquitoes: a precursor to successful worldwide colonization? *Mol Ecol* 25(17):4337–4354.
  13. Eskildsen GA, et al. (2018) Maternal invasion history of *Aedes aegypti* and *Aedes albopictus* into the Isthmus of Panama: Implications for the control of emergent viral disease agents. *PLoS One* 13(3):e0194874.
  14. Miller MJ, Loaiza JR (2015) geographic expansion of the invasive mosquito *Aedes albopictus* across Panama—Implications for control of Dengue and Chikungunya viruses. *PLoS Negl Trop Dis* 9(1):e0003383.
  15. Bennett KL, et al. (2019) High infestation of invasive *Aedes* mosquitoes along the highways of Panama: Impact on vector ecology and disease control. *Parasit Vectors*. 12(1):264.
  16. Kraemer MUG, et al. (2015) The global distribution of the arbovirus vectors *Aedes aegypti* and *Ae. albopictus*. *Elife* 4:e08347.
  17. Kamal M, Kenawy MA, Rady MH, Khaled AS, Samy AM (2019) Mapping the global potential distributions of two arboviral vectors *Aedes aegypti* and *Ae. albopictus* under changing climate. *PLoS One* 13(12):e0210122.
  18. Lounibos LP, Juliano SA (2018) Where vectors collide: the importance of mechanisms shaping the realized niche for modeling ranges of invasive *Aedes* mosquitoes. *Biol Invasions* 20(8):1913–1929.
  19. Kotsakiozi P, Gloria-Soria A, Schaffner F, Robert V, Powell JR (2018) *Aedes aegypti* in the Black Sea: recent introduction or ancient remnant? *Parasit Vectors* 11(1):396.
  20. Kotsakiozi P, et al. (2018) Population structure of a vector of human diseases: *Aedes aegypti* in its ancestral range, Africa. *Ecol Evol* 8(16):7835–7848.



21. Pless E, et al. (2017) Multiple introductions of the dengue vector, *Aedes aegypti*, into California. *PLoS Negl Trop Dis* 11(8):e0005718.
22. Saarman NP, et al. (2017) Effective population sizes of a major vector of human diseases, *Aedes aegypti*. *Evol Appl* 10(10):1031–1039.
23. Gloria-Soria A, et al. (2018) Origin of a high-latitude population of *Aedes aegypti* in Washington, DC. *Am J Trop Med Hyg* 98(2):445–452.
24. Rašić G, Filipović I, Weeks AR, Hoffmann AA (2014) Genome-wide SNPs lead to strong signals of geographic structure and relatedness patterns in the major arbovirus vector, *Aedes aegypti*. *BMC Genomics* 15(1):275.
25. Forester BR, Lasky JR, Wagner HH, Urban DL (2018) Comparing methods for detecting multilocus adaptation with multivariate genotype–environment associations. *Mol Ecol* 27(9):2215–2233.
26. Rellstab C, Gugerli F, Eckert AJ, Hancock AM, Holderegger R (2015) A practical guide to environmental association analysis in landscape genomics. *Mol Ecol* 24(17):4348–4370.
27. de Villemereuil P, Frichot É, Bazin É, François O, Gaggiotti OE (2014) Genome scan methods against more complex models: when and how much should we trust them? *Mol Ecol* 23(8):2006–2019.
28. Loaiza J, Miller M (2019) Historical and contemporary forces combine to shape patterns of genetic differentiation in two species of Mesoamerican *Anopheles* mosquitoes. *Biol J Linn Soc* 126:146–157.
29. Brady OJ, et al. (2014) Global temperature constraints on *Aedes aegypti* and *Ae. albopictus* persistence and competence for dengue virus transmission. *Parasit Vectors* 7(1):338.
30. Brady OJ, et al. (2013) Modelling adult *Aedes aegypti* and *Aedes albopictus* survival at different temperatures in laboratory and field settings. *Parasit Vectors* 6(1):351.
31. Afify A, Galizia CG (2015) Chemosensory cues for mosquito oviposition site selection. *J Med Entomol* 52(2):120–130.
32. Tun-Lin W, Burkot TR, Kay BH (2000) Effects of temperature and larval diet on development rates and survival of the dengue vector *Aedes aegypti* in north Queensland, Australia. *Med Vet Entomol* 14(1):31–37.
33. Lounibos LP, et al. (2010) Differential survivorship of invasive mosquito species in South Florida cemeteries: Do site-specific microclimates explain patterns of coexistence and exclusion? *Ann Entomol Soc Am* 103(5):757–770.

34. Vezzani D, Rubio A, Velázquez SM, Schweigmann N, Wiegand T (2005) Detailed assessment of microhabitat suitability for *Aedes aegypti* (Diptera: Culicidae) in Buenos Aires, Argentina. *Acta Trop* 95(2):123–131.
35. Kapun M, Fabian DK, Goudet J, Flatt T (2016) genomic evidence for adaptive inversion clines in *Drosophila melanogaster*. *Mol Biol Evol* 33(5):1317–1336.
36. Love RR, et al. (2016) Chromosomal inversions and ecotypic differentiation in *Anopheles gambiae*: the perspective from whole-genome sequencing. *Mol Ecol* 25(23):5889–5906.
37. Simard F, et al. (2009) Ecological niche partitioning between *Anopheles gambiae* molecular forms in Cameroon: the ecological side of speciation. *BMC Ecol* 9(1):17.
38. Cheng C, et al. (2012) Ecological genomics of *Anopheles gambiae* along a latitudinal cline: a population-resequencing approach. *Genetics* 190(4):1417–1432.
39. Ayala D, Ullastres A, González J (2014) Adaptation through chromosomal inversions in *Anopheles*. *Front Genet* 5:129.
40. White BJ, Collins FH, Besansky NJ (2011) Evolution of *Anopheles gambiae* in Relation to Humans and Malaria. *Annu Rev Ecol Evol Syst* 42(1):111–132.
41. Exposito-Alonso M, et al. (2018) Genomic basis and evolutionary potential for extreme drought adaptation in *Arabidopsis thaliana*. *Nat Ecol Evol* 2(2):352–358.
42. Hancock AM, et al. (2011) Adaptation to climate across the *Arabidopsis thaliana* genome. *Science* (80- ) 334(6052):83 LP – 86.
43. Oliveira EF, et al. (2018) Climatic suitability, isolation by distance and river resistance explain genetic variation in a Brazilian whiptail lizard. *Heredity (Edinb)* 120(3):251–265.
44. Zhen Y, et al. (2017) Genomic divergence across ecological gradients in the Central African rainforest songbird (*Andropadus virens*). *Mol Ecol* 26(19):4966–4977.
45. Ahrens CW, Byrne M, Rymer PD (2019) Standing genomic variation within coding and regulatory regions contributes to the adaptive capacity to climate in a foundation tree species. *Mol Ecol* 28(10):2502–2516.
46. Miller AD, et al. (2019) Local and regional scale habitat heterogeneity contribute to genetic adaptation in a commercially important marine mollusc (*Haliotis rubra*) from southeastern Australia. *Mol Ecol* 28: 3053-3072.
47. Geue JC, Vágási CI, Schweizer M, Pap PL, Thomassen HA (2016) Environmental selection is a main driver of divergence in house sparrows (*Passer domesticus*) in Romania and Bulgaria. *Ecol Evol* 6(22):7954–7964.

48. Gonçalves CM, et al. (2014) Distinct variation in vector competence among nine field populations of *Aedes aegypti* from a Brazilian dengue-endemic risk city. *Parasit Vectors* 7(1):320.
49. Roundy CM, et al. (2017) Variation in *Aedes aegypti* mosquito competence for Zika virus transmission. *Emerg Infect Dis J* 23(4):625.
50. Vega-Rúa A, Zouache K, Girod R, Failloux A-B, Lourenço-de-Oliveira R (2014) High level of vector competence of *Aedes aegypti* and *Aedes albopictus* from ten American countries as a crucial factor in the spread of Chikungunya virus. *J Virol* 88(11):6294–6306.
51. Hugo LE, et al. (2019) Vector competence of Australian *Aedes aegypti* and *Aedes albopictus* for an epidemic strain of Zika virus. *PLoS Negl Trop Dis* 13(4):e0007281.
52. Lounibos LP, Kramer LD (2016) Invasiveness of *Aedes aegypti* and *Aedes albopictus* and vectorial capacity for Chikungunya virus. *J Infect Dis* 214(suppl 5):S453–S458.
53. Chouin-Carneiro T, et al. (2016) Differential susceptibilities of *Aedes aegypti* and *Aedes albopictus* from the Americas to Zika virus. *PLoS Negl Trop Dis* 10(3):e0004543.
54. Kalluri S, Gilruth P, Rogers D, Szczur M (2007) surveillance of arthropod vector-borne infectious diseases using remote sensing techniques: A review. *PLOS Pathog* 3(10):e116.
55. Bartlow WA, et al. (2019) forecasting zoonotic infectious disease response to climate change: Mosquito vectors and a changing environment. *Vet Sci* 6(2).
56. Kearney M, Porter WP, Williams C, Ritchie S, Hoffmann AA (2009) Integrating biophysical models and evolutionary theory to predict climatic impacts on species' ranges: the dengue mosquito *Aedes aegypti* in Australia. *Funct Ecol* 23(3):528–538.
57. Pinsky ML (2019) Species coexistence through competition and rapid evolution. *Proc Natl Acad Sci* 116(7):2407 LP – 2409.
58. Leibold MA, Urban MC, De Meester L, Klausmeier CA, Vanoverbeke J (2019) Regional neutrality evolves through local adaptive niche evolution. *Proc Natl Acad Sci* 116(7):2612 LP – 2617.
59. Kinnison MT, Hairston JR NG (2007) Eco-evolutionary conservation biology: contemporary evolution and the dynamics of persistence. *Funct Ecol* 21(3):444–454.
60. Jiggins FM (2017) The spread of Wolbachia through mosquito populations. *PLOS Biol* 15(6):e2002780.
61. Bargielowski I, Carrasquilla MC, Nishimura N, Lounibos LP (2016) Coexistence of *Aedes aegypti* and *Aedes albopictus* (Diptera: Culicidae) in peninsular Florida two

- decades after competitive displacements. *J Med Entomol* 53(6):1385–1390.
62. O’meara GF, Evans Leonard F. J, Gettman AD, Cuda JP (1995) Spread of *Aedes albopictus* and decline of *Ae. aegypti* (Diptera: Culicidae) in Florida. *J Med Entomol* 32(4):554–562.
  63. Braks MAH, Honório NA, Lounibos LP, Lourenço-de-Oliveira R, Juliano SA (2004) Interspecific competition between two invasive species of container mosquitoes, *Aedes aegypti* and *Aedes albopictus* (Diptera: Culicidae), in Brazil. *Ann Entomol Soc Am* 97(1):130–139.
  64. Juliano SA (1998) species introduction and replacement among mosquitoes: interspecific resource competition or apparent competition? *Ecology* 79(1):255–268.
  65. Kaplan L, Kendell D, Robertson D, Livdahl T, Khatchikian C (2010) *Aedes aegypti* and *Aedes albopictus* in Bermuda: extinction, invasion, invasion and extinction. *Biol Invasions* 12(9):3277–3288.
  66. Leisnham P, Juliano S (2010) Interpopulation differences in competitive effect and response of the mosquito *Aedes aegypti* and resistance to invasion by a superior competitor. *Oecologia*. 164(1):221-230.
  67. Juliano SA, O’Meara GF, Morrill JR, Cutwa MM (2002) Desiccation and thermal tolerance of eggs and the coexistence of competing mosquitoes. *Oecologia* 130(3):458–469.
  68. Faraji A, et al. (2014) Comparative host feeding patterns of the Asian tiger mosquito, *Aedes albopictus*, in urban and suburban Northeastern USA and implications for disease transmission. *PLoS Negl Trop Dis* 8(8):e3037–e3037.
  69. Pereira Dos Santos T, et al. (2018) Potential of *Aedes albopictus* as a bridge vector for enzootic pathogens at the urban-forest interface in Brazil. *Emerg Microbes Infect* 7(1):191.
  70. Possas C, et al. (2018) Yellow fever outbreak in Brazil: the puzzle of rapid viral spread and challenges for immunisation. *Mem Inst Oswaldo Cruz* 113(10):e180278–e180278.
  71. Prunier J, Laroche J, Beaulieu J, Bousquet J (2011) Scanning the genome for gene SNPs related to climate adaptation and estimating selection at the molecular level in boreal black spruce. *Mol Ecol* 20(8):1702–1716.
  72. Shryock DF, et al. (2015) Landscape genomics of *Sphaeralcea ambigua* in the Mojave Desert: a multivariate, spatially-explicit approach to guide ecological restoration. *Conserv Genet* 16(6):1303–1317.
  73. Pais AL, Whetten RW, Xiang Q-Y (Jenny) (2017) Ecological genomics of local adaptation in *Cornus florida* L. by genotyping by sequencing. *Ecol Evol* 7(1):441–465.

74. Dudaniec RY, Yong CJ, Lancaster LT, Svensson EI, Hansson B (2018) Signatures of local adaptation along environmental gradients in a range-expanding damselfly (*Ischnura elegans*). *Mol Ecol* 27(11):2576–2593.
75. Bay RA, et al. (2018) Genomic signals of selection predict climate-driven population declines in a migratory bird. *Science* (80- ) 359(6371):83–86.
76. Hoban S, et al. (2016) Finding the genomic basis of local adaptation: Pitfalls, practical solutions, and future directions. *Am Nat* 188(4):379–397.
77. Savolainen O, Lascoux M, Merilä J (2013) Ecological genomics of local adaptation. *Nat Rev Genet* 14:807.
78. Rueda LM (2004) Pictorial keys for the identification of mosquitoes (Diptera: Culicidae) associated with dengue virus transmission. *Zootaxa*. 589-560.
79. Surendran SN, et al. (2013) Molecular characterization and identification of members of the *Anopheles subpictus* complex in Sri Lanka. *Malar J* 12(1):304.
80. Krueger F (2015) Trim Galore!: A wrapper tool around Cutadapt and FastQC to consistently apply quality and adapter trimming to FastQ files.
81. Li H, Durbin R (2010) Fast and accurate long-read alignment with Burrows–Wheeler transform. *Bioinformatics* 26(5):589–595.
82. QGIS Development Team (2019) QGIS Geographic Information System. Open Source Geospatial Foundation Project. <http://qgis.osgeo.org>.
83. R Core Team (2019) R: A language and environment for statistical computing. R Foundation for Statistical Computing, Vienna, Austria. <http://www.R-project.org/>.
84. Raj A, Stephens M, Pritchard JK (2014) fastSTRUCTURE: variational inference of population structure in large SNP data sets. *Genetics* 197(2):573 LP – 589.
85. Luu K, Bazin E, Blum MGB (2016) PCADAPT: An R Package to Perform Genome Scans for Selection Based on Principal Component Analysis. *Mol Ecol Resour.* 17(1):67-77.
86. Frichot E, Schoville SD, Bouchard G, François O (2013) testing for associations between loci and environmental gradients using Latent Factor Mixed Models. *Mol Biol Evol* 30(7):1687–1699.
87. Oksanen J, et al. (2018) vegan: Community Ecology Package.
88. Legendre P, Oksanen J, ter Braak CJF (2011) Testing the significance of canonical axes in redundancy analysis. *Methods Ecol Evol* 2(3):269–277.
89. Fitzpatrick MC, Keller SR (2014) Ecological genomics meets community-level modelling of biodiversity: mapping the genomic landscape of current and future

- environmental adaptation. *Ecol Lett* 18(1):1–16.
90. Pembleton LW, Cogan NOI, Forster JW (2013) StAMPP: an R package for calculation of genetic differentiation and structure of mixed-ploidy level populations. *Mol Ecol Resour* 13:946–952.
  91. Bischl B, et al. (2017) BBmisc: Miscellaneous Helper Functions for B. Bischl.
  92. Manion G, et al. (2018) gdm: Generalized Dissimilarity Modeling.
  93. Ellis N, Smith SJ, Pitcher CR (2012) Gradient forests: calculating importance gradients on physical predictors. *Ecology* 93(1):156–168.
  94. Group 1000 Genomes Project Analysis, et al. (2011) The variant call format and VCFtools. *Bioinformatics* 27(15):2156–2158.



## Figure legends

**Fig 1. Strong local population structure within the context of regional homogeneity and global population structure:** (A) FastStructure plot of 6K populations comparing 2,630 SNP's in individuals of *Ae. aegypti* from Bocas del Toro and the rest of Panama to genetically similar populations originating from South-western USA, Caribbean islands, Costa Rica and Columbia. FastStructure assigns each individual to one or more K populations, as indicated by its colour. Genetically similar populations share the same colour or similar admixture composition on comparison. (B) Admixture proportions of 2K populations in relation to sampling locations and population heterozygosity  $H_s$  of *Ae. aegypti* across Panama as determined by FastStructure for 371,307 SNP's. (C) PCA of all *Ae. aegypti* SNP's grouped by region.

**Fig 2. Putative adaptive variation in *Ae. aegypti* is partitioned between wet and dry tropical environments and associated with temperature and vegetation indices:** (A) Ordination triplot of the first two constrained ordination axes of the redundancy analysis representing SNP's either positively or negatively associated with the environmental variables as depicted by the position of the arrows. *Ae. aegypti* from the wettest region (blue) and driest region (red) are highlighted. (B) Compositional turnover splines for GDM analysis for the reference loci that are putatively neutral (dashed line) and the 128 candidate loci with a signal of local adaptation (black line) in association with NDVI vegetation index (NDVI), average minimum temperature (MinT), average maximum temperature (MaxT), average humidity (Humidity), average rainfall (Rain) and human population density (HPopD). A change in allele frequency relative to the reference loci is seen in the putatively adaptive alleles with increasing values of NDVI and MinT, marked in bold with an asterix.

**Fig 3. Patches of local adaptation are revealed on comparison of putative neutral and adaptive variation across geographical space:** RGB maps of compositional allele frequency turnover across geographical space based on GDM analysis of (A) putatively neutral loci, (B) the 128 candidate loci with a signal of local adaptation and (C) the difference in allele compositional turnover between the putatively neutral reference loci and putatively adaptive candidate dataset using a Procrustes superimposition on the PCA ordinations. On maps (A) and (B), the dissimilarity between allele composition is depicted by an increasing divergent colour spectrum. Locations with a similar allele composition are a similar colour. On map (C), the scale represents the distance between the allele compositional turnover of the reference and candidate SNP datasets, with higher distances indicating areas that are potentially experiencing local adaptation.

**Fig 4. The species replacement and co-occurrence of *Aedes* species is condition dependent:** (A) The presence of *Ae. aegypti* (orange), *Ae. albopictus* (blue) and species co-occurrence (yellow) recorded by extensive sampling with both active surveillance and oviposition traps during the wet season months from 2016 through to 2018 in comparison to (B) Species occurrence data recorded from 2005 through 2017 through active surveillance by the Ministry of Health in Panama.

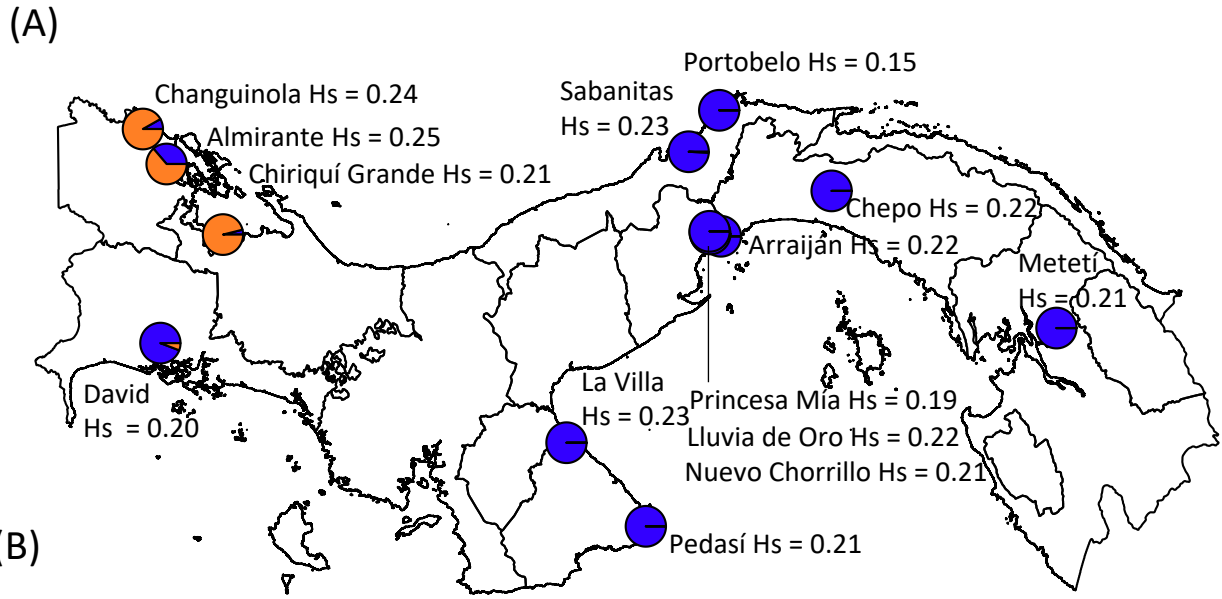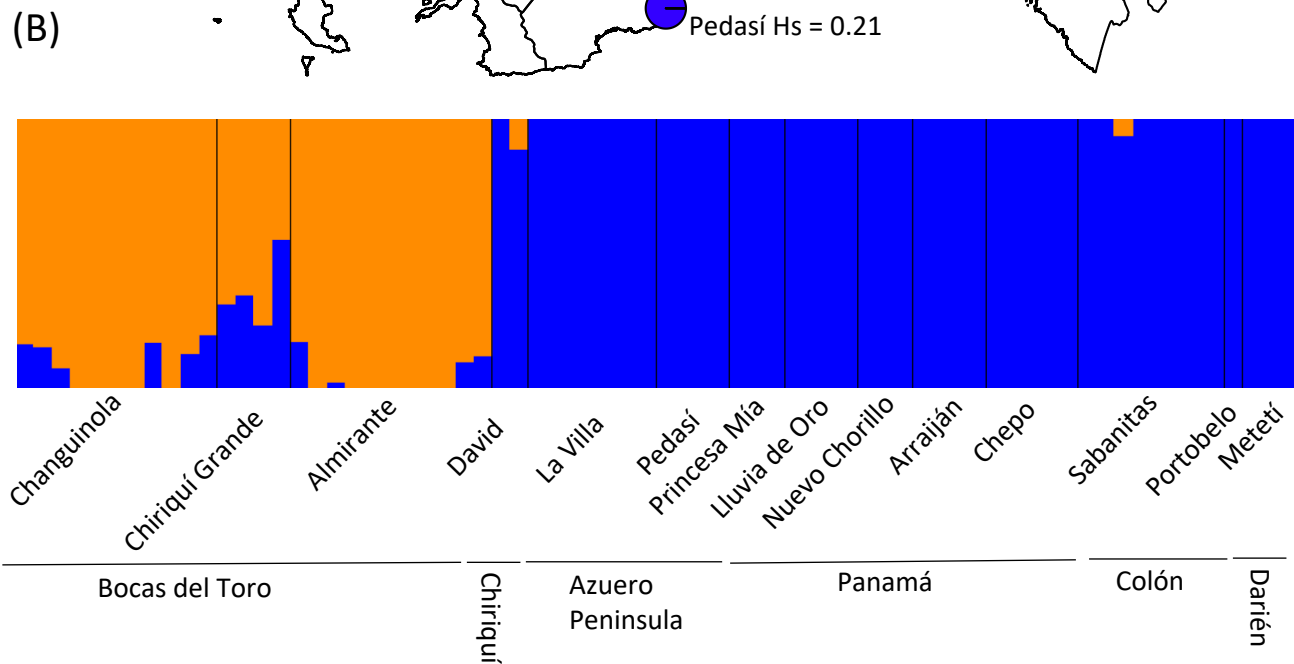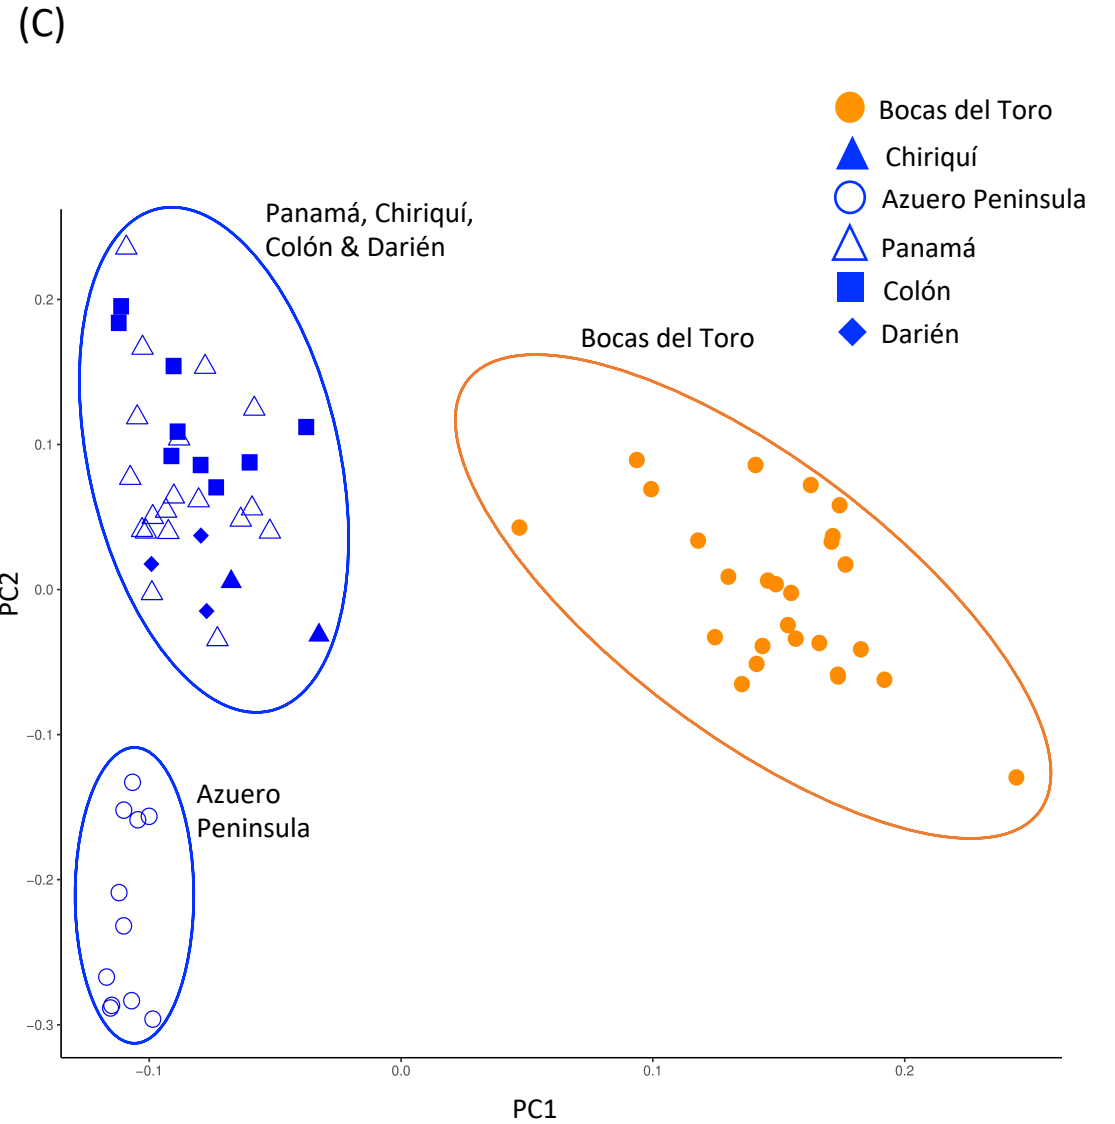

(A)

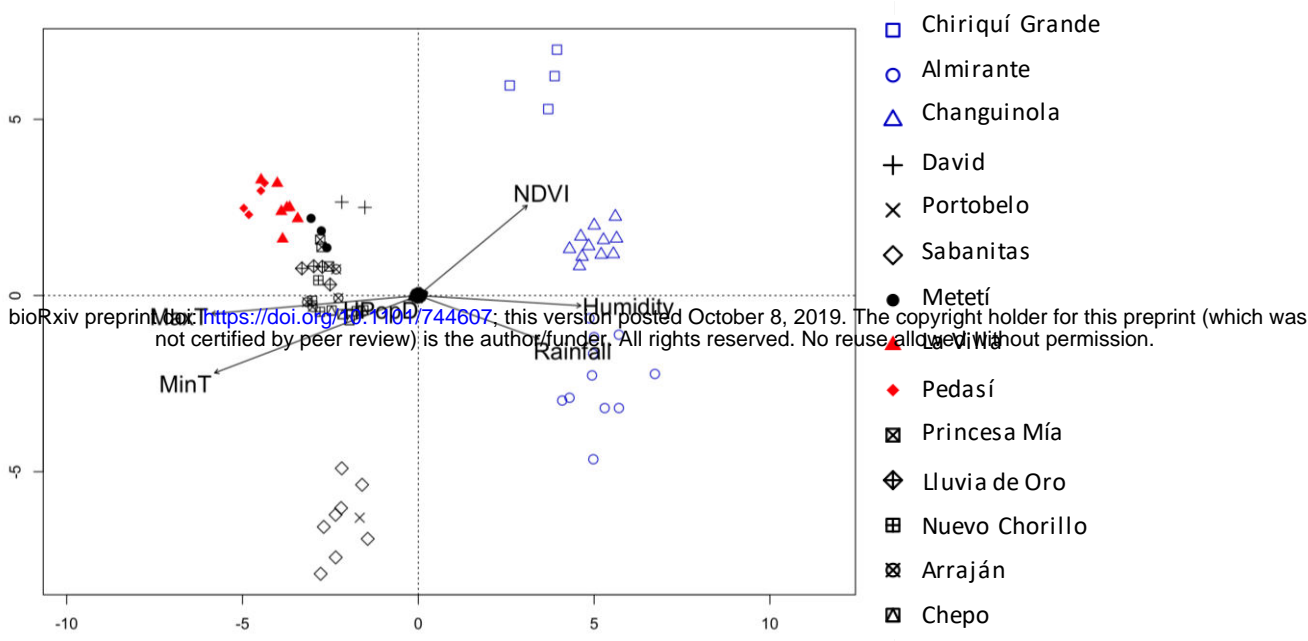

(B)

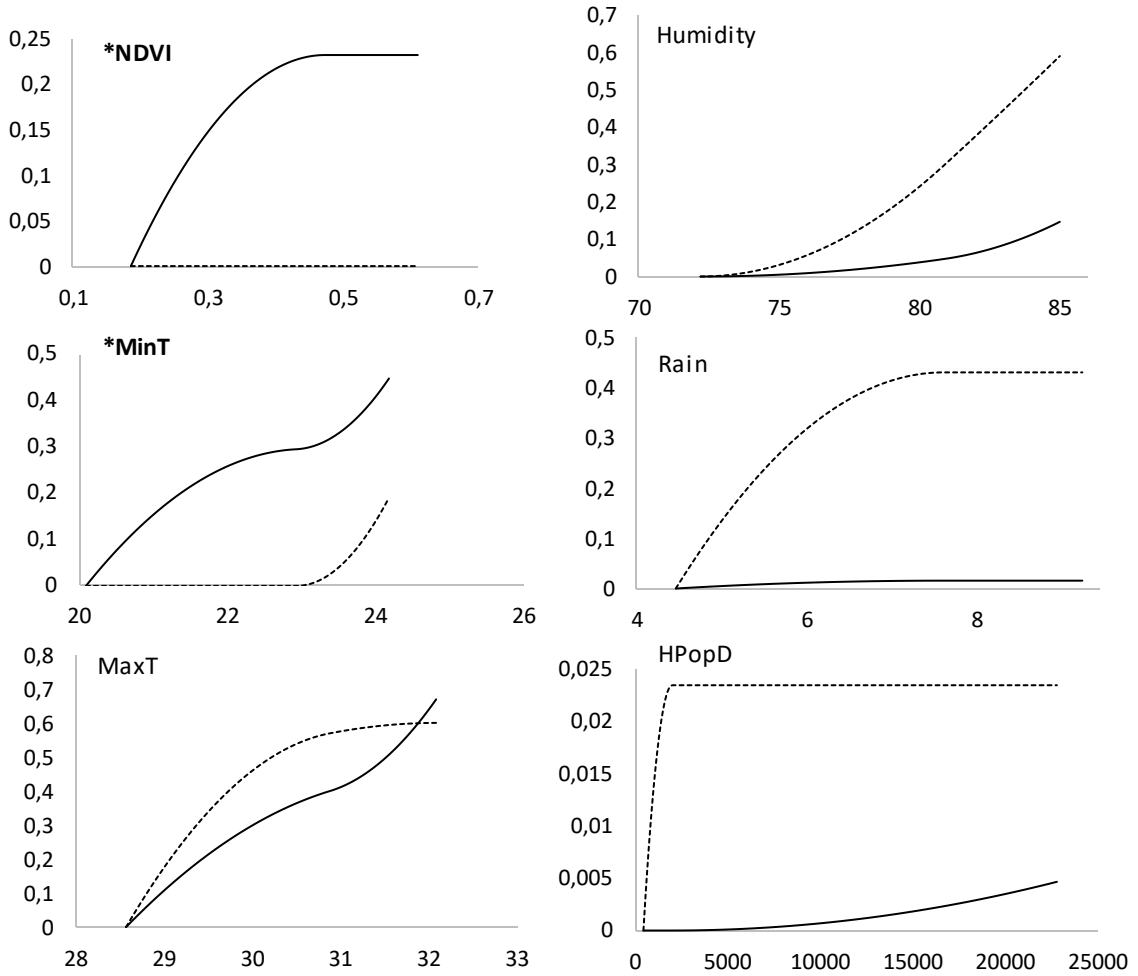

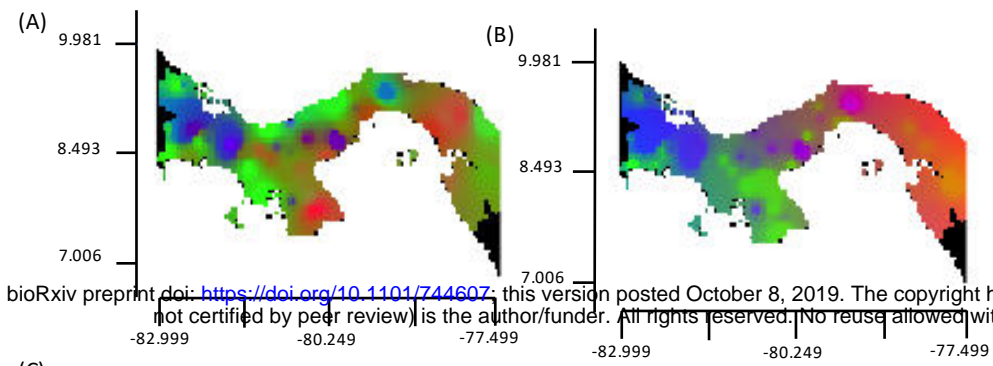

bioRxiv preprint doi: <https://doi.org/10.1101/744607>; this version posted October 8, 2019. The copyright holder for this preprint (which was not certified by peer review) is the author/funder. All rights reserved. No reuse allowed without permission.

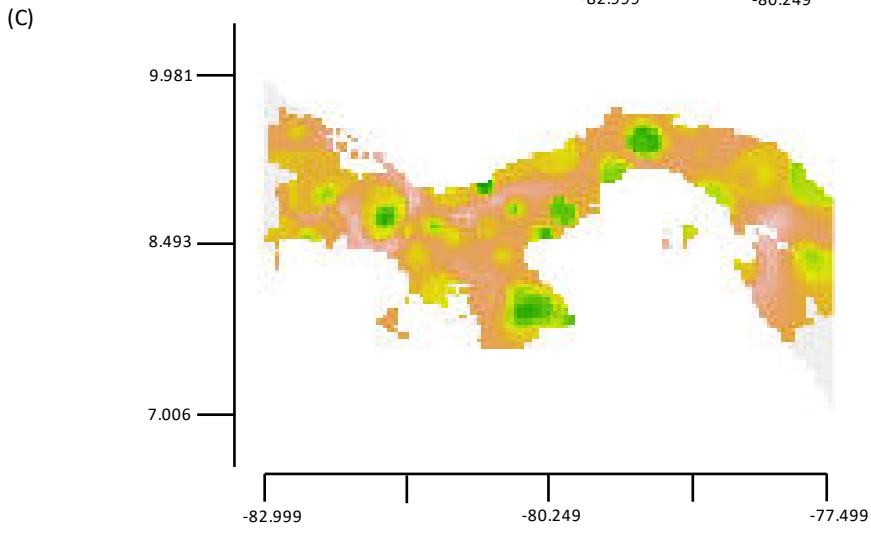

(A)

This study 2016-2018

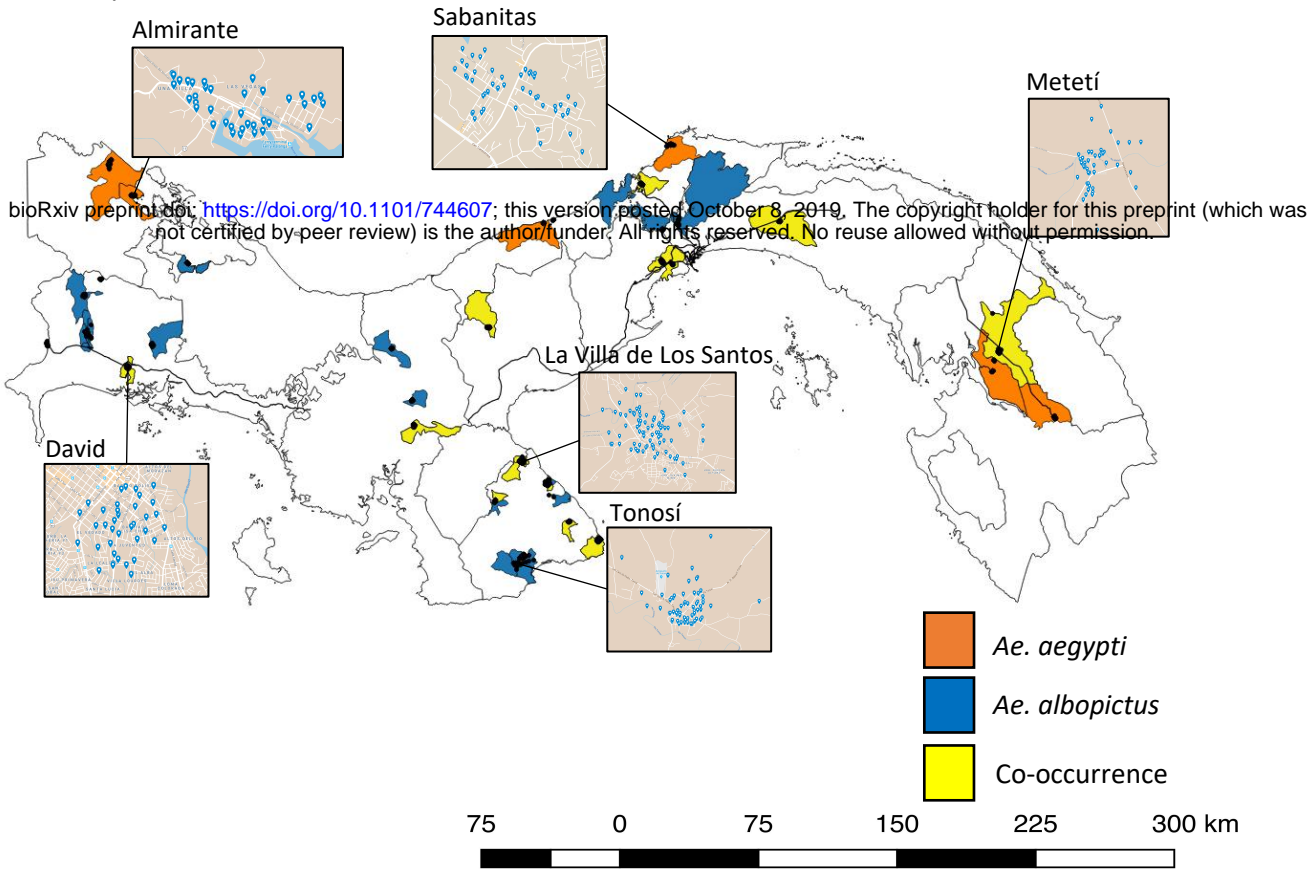

(B)

MINSAs 2005-2007

MINSAs 2008-2010

MINSAs 2011-2013

MINSAs 2014-2016

MINSAs 2017

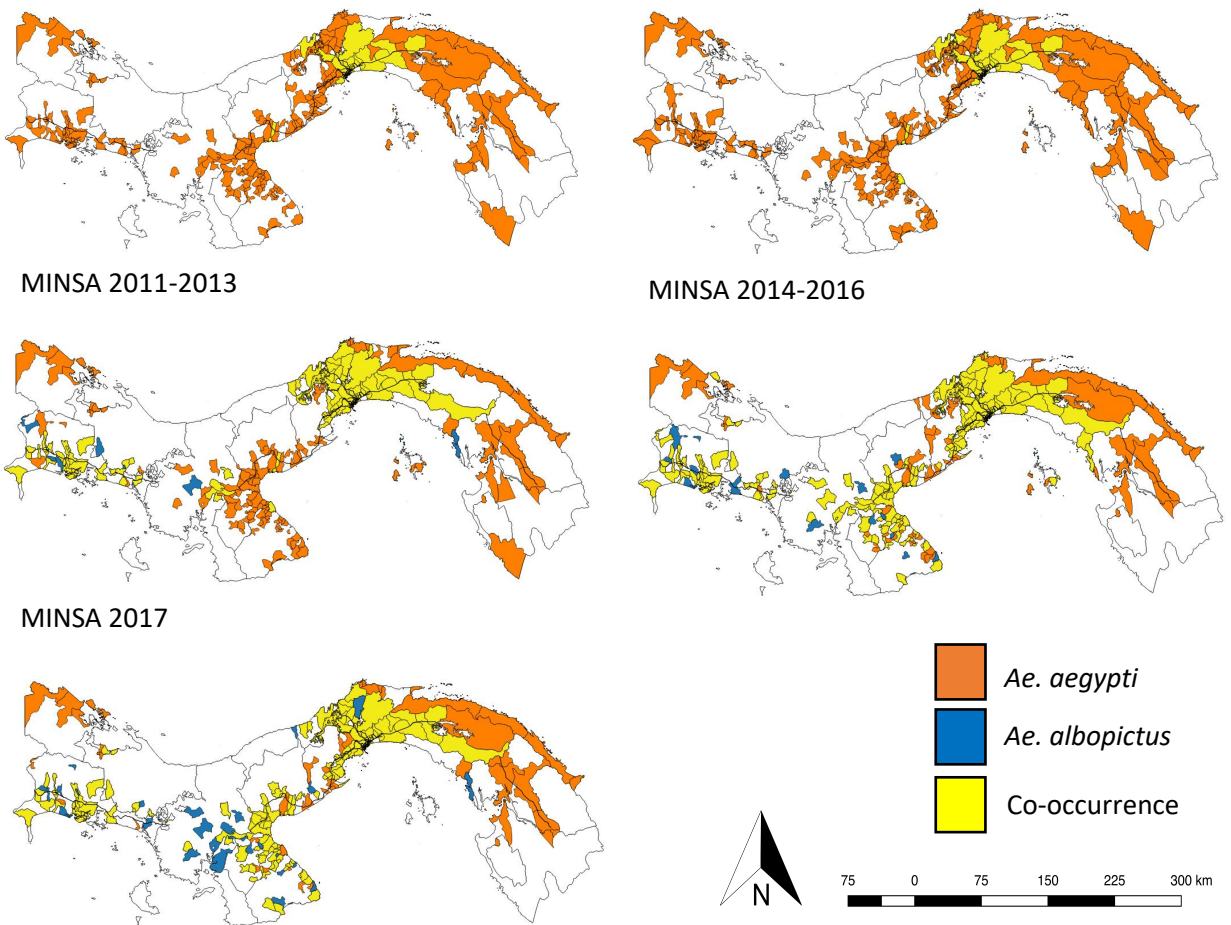

Source: https://www.biorxiv.org/content/10.1101/744607v2.full.pdf
